# Supplementary material for: Predictive and Stochastic Reduced Order Modelling of Wind Turbine Wake Dynamics
Source: Copernicus journal article supplement (doi:10.5194/wes-2022-45), 2022-06-08
Supplement: Supplementary file [file wes-2022-45-AC2-supplement.pdf]

# Response to Review: Predictive and Stochastic Reduced Order Modelling of Wind Turbine Wake Dynamics

Thank you for the detailed review and the positive comments. We have addressed all comments in the updated manuscript and below, where review comments are given in black and response in blue. It should be noted that some minor updates have occurred. We have replaced Welch with a logarithmic-window moving average filter to reduce the spread of the spectra without losing low frequency information. This improves the spectra, particularly at low frequencies because it can better resolve lower frequencies and removes noise at high, which improves interpolation. We have also decided to plot Figure 11 with log-scale on the y-axis to provide clearer comparison of the histograms.

## Response to Reviewer 2:

The article provides a model derived from LES to predict turbulent wind turbine wake dynamics, applied at two downstream locations within a long row. The model is built in a reduced parameter space denoting that the thrust coefficient indirectly encapsulates the effects of numerous other parameters of the flow, such as atmospheric turbulence intensity, spacing of the farm, etc. Proper orthogonal decomposition is employed to build the predictive and stochastic model.

Reasoning for why the model is relevant to the community and the general description of the methods are well described in the article. I believe the article is of importance and can benefit future turbulence modeling and recommend the article for publication with revisions based on the points outlined.

Thanks for the detailed review and the positive comments. We have addressed all comments in the updated manuscript and below. Following your comment we have decided to remove the sentence on indirectly encapsulating spacing etc for clarity.

Specific comments:

Figure 2a – I believe the y axis ( $z/z_0$ ) should be nondimensional.  
Thanks for noticing. We have updated the figure.

It is unclear how many snapshots are used for the POD, is it all 131,072 at 10Hz?  
We agree that we should have written this more clearly. We have now specified how every 100th snapshot is utilized for the global POD.

Why are 50 modes used for reconstruction? How much energy is associated with those 50 modes? 50 modes is to some degree arbitrary. We have used 5, 10, 20, and 50 to show the convergence and sensitivity of including more modes. Essentially, we do not gain much information by including more than 50 modes, when the aim is to capture power and load distributions. But there is no limit to how many modes can be included. In terms of the associated energy, see elaborate answer

below related to the variance and eigenvalues.

Why do the authors present the variance of the model time series in lieu of the eigenvalues? It is noted that the decreasing trends are similar but do the trends between the cases show similar results as well? For the near and far-downstream turbines?

The global eigenvalues are essentially nonsensical as we utilize a global POD, where we combine datasets. As we project the flow into the global POD modes we obtain the associated modal time series, and the resulting variance corresponds to the energy content. However, we can not sum the variance of the modal time series to obtain the "full" energy content as the time series are correlated. To summarize, Figure 7 highlights two aspects:

1. Overall, the decreasing trend show that the although the global basis is not fully optimal for the individual cases as a single POD would be, it is very close. This is part of the strength of the model and the reason, why it works across very different flow scenarios.
2. The (minor) "non-optimality" is occasionally seen as the variance of higher modes is larger than the variance of smaller modes, i.e. for certain flow cases the global modes effectively change places in terms of importance.

We have now expanded this explanation further in the text.

Is there any reasoning for the skew of the PDFs for the first few modes of the farther downstream turbine and in turn, why this is not captured in the model?

Good question, which is harder to fully answer. It is very interesting that this only happens for the lowest modes, which are related to the low frequencies and which we associate with corrections to the mean flow. It makes sense that a time series that corrects the mean flow could have skewed distributions. This is not captured by the model, because the spectral time series generation only yields Gaussian marginally distributed time series of the modes. However, that does not imply that the constructed flow time series are Gaussian. The correlation across modal time series introduces non-Gaussianity in the constructed flow.

Specific corrections:

Thanks, we have implemented all the following suggestions.

Line 20: captures – > capture

Line 22: particular – > particularly

Line 62: of model by – > of the model by

Line 229: arise, particular between – > arise, in particular between

Line 248: values affects – > values affect
